# Supplementary material for: Dual utility of a single diphosphine–ruthenium complex: a precursor for new complexes and, a pre-catalyst for transfer-hydrogenation and Oppenauer oxidation
Source: Royal Society of Chemistry journal article supplement (doi:10.1039/d1ra01594j), 2021-01-01
Supplement: d1ra01594j1.pdf [file d1ra01594j1.pdf]

**Manuscript ID: RA-ART-02-2021-001594 (Revised version)**

## **Electronic Supplementary Information**

### **Dual utility of a single diphosphine-ruthenium complex: a precursor for new complexes and, a pre-catalyst for transfer-hydrogenation and Oppenauer oxidation**

Aparajita Mukherjee and Samaresh Bhattacharya\*

*Department of Chemistry, Inorganic Chemistry Section, Jadavpur University,  
Kolkata - 700 032, India. E-mail: samaresh\_b@yahoo.com; Fax: 91-33-24146223*

**Table S1** Selected bond lengths (Å) and bond angles (°) for [Ru(dppbz)(CO)(dmsO)Cl<sub>2</sub>]

| Bond lengths (Å) |            |           |           |
|------------------|------------|-----------|-----------|
| Ru1-Cl1          | 2.430(7)   | C7-O1     | 1.09(2)   |
| Ru1-Cl2          | 2.418(6)   | P1-C1     | 1.843(18) |
| Ru1-P1           | 2.323(6)   | C1-C6     | 1.35(2)   |
| Ru1-P2           | 2.311(6)   | P2-C2     | 1.811(17) |
| Ru1-C7           | 1.878(19)  | S1-C8     | 1.85(2)   |
| Ru1-S1           | 2.374(6)   | S1-C9     | 1.74(2)   |
|                  |            | S1-O2     | 1.465(16) |
| Bond angles (°)  |            |           |           |
| C7-Ru1-Cl2       | 176.9(7)   | P1-Ru1-P2 | 82.75(17) |
| P1-Ru1-S1        | 178.1(2)   | Ru1-C7-O1 | 177.6(18) |
| P2-Ru1-Cl1       | 173.21(17) |           |           |

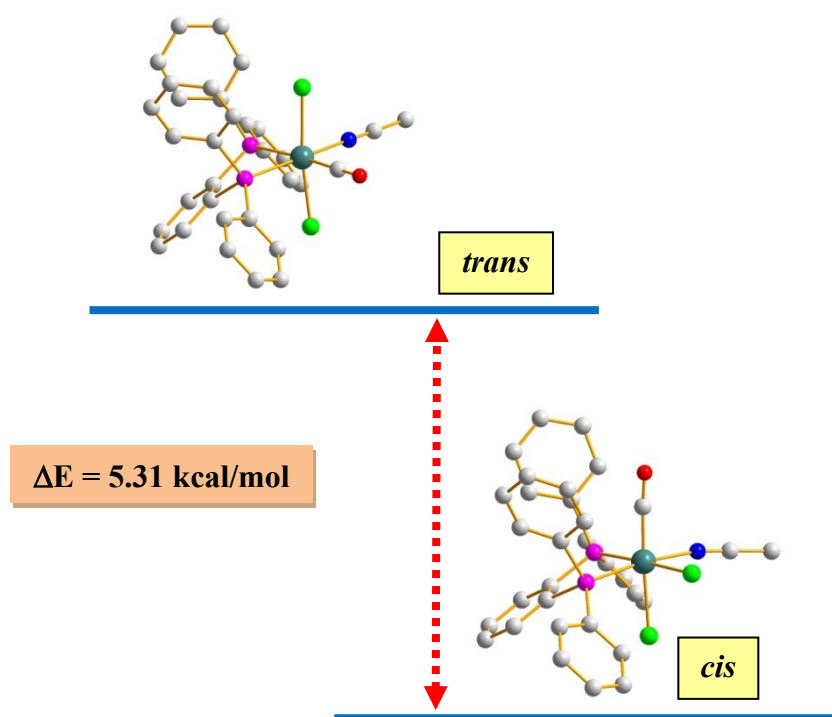

**Fig. S1** DFT-optimized structures of the *cis* and *trans* isomers of the [Ru(dppbz)(CO)(CH<sub>3</sub>CN)Cl<sub>2</sub>], and the energy difference between them.

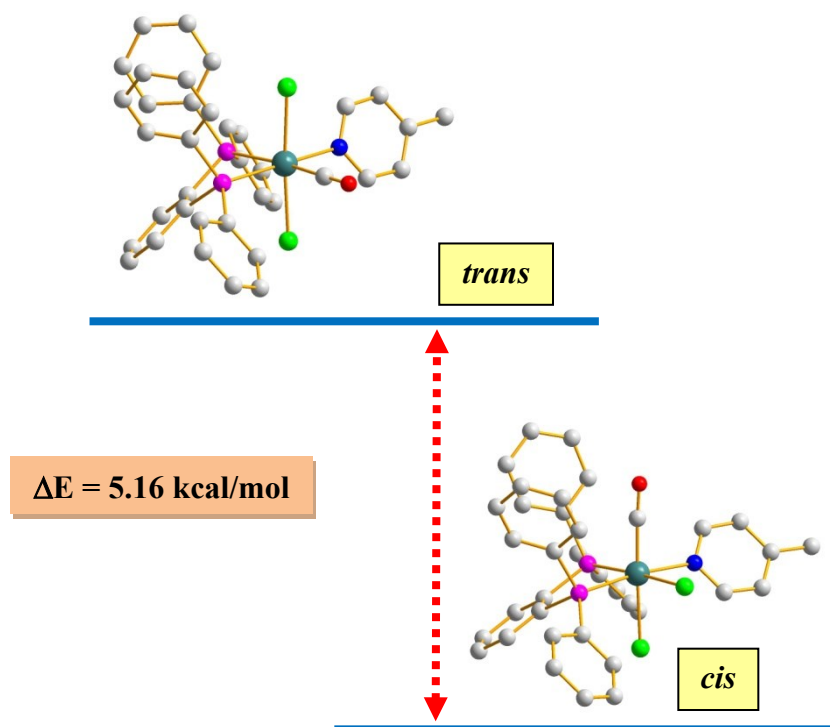

**Fig. S2** DFT-optimized structures of the *cis* and *trans* isomers of the [Ru(dppbz)(CO)(4-picoline)Cl<sub>2</sub>], and the energy difference between them.

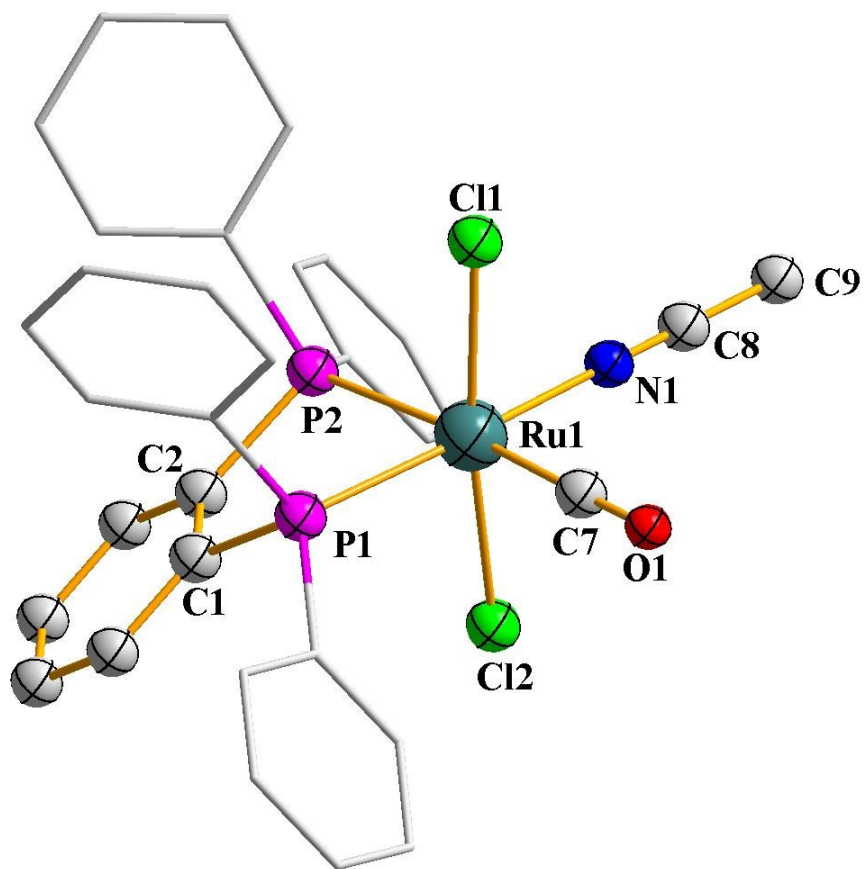

**Fig. S3** DFT-optimized structure of [Ru(dppbz)(CO)(CH<sub>3</sub>CN)Cl<sub>2</sub>].

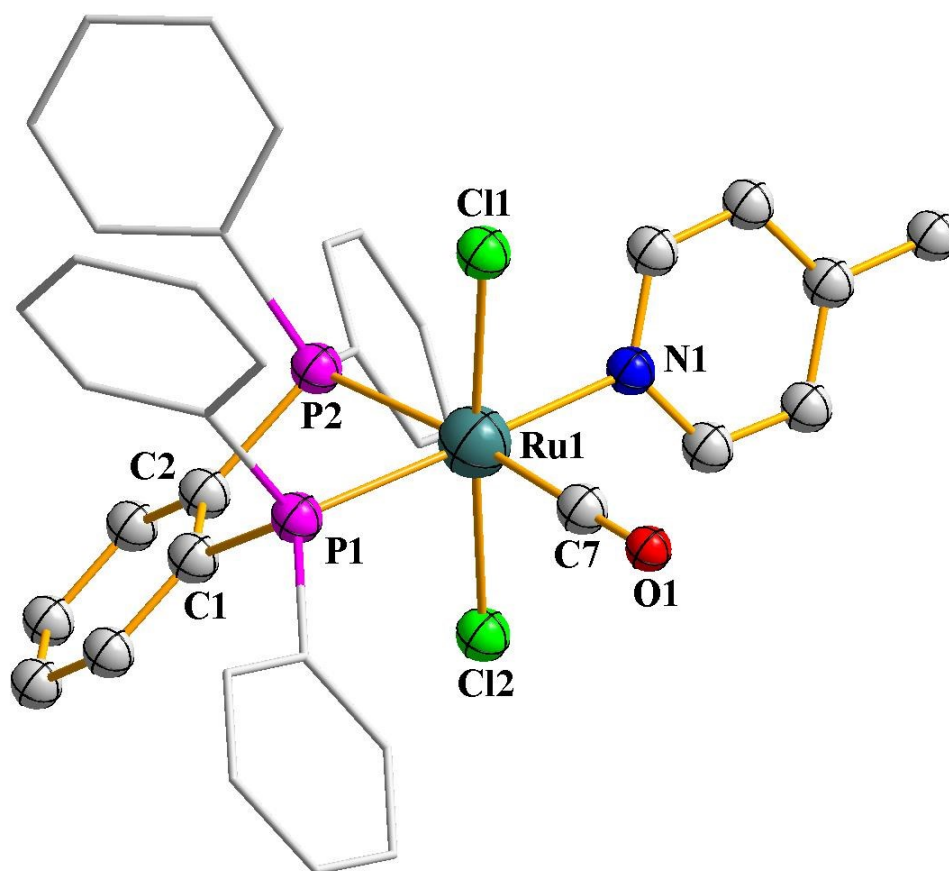

**Fig. S4** DFT-optimized structure of [Ru(dppbz)(CO)(4-picoline)Cl<sub>2</sub>].

**Table S2** Selected bond lengths (Å) and bond angles (°) for the DFT-optimized structures of [Ru(dppbz)(CO)(CH<sub>3</sub>CN)Cl<sub>2</sub>] and [Ru(dppbz)(CO)(4-picoline)Cl<sub>2</sub>] complexes.

| [Ru(dppbz)(CO)(CH <sub>3</sub> CN)Cl <sub>2</sub> ] |        | [Ru(dppbz)(CO)(4-picoline)Cl <sub>2</sub> ] |        |
|-----------------------------------------------------|--------|---------------------------------------------|--------|
| Bond lengths (Å)                                    |        |                                             |        |
| Ru1-Cl1                                             | 2.475  | Ru1-Cl1                                     | 2.482  |
| Ru1-Cl2                                             | 2.506  | Ru1-Cl2                                     | 2.512  |
| Ru1-P1                                              | 2.362  | Ru1-P1                                      | 2.367  |
| Ru1-P2                                              | 2.494  | Ru1-P2                                      | 2.523  |
| Ru1-N1                                              | 2.103  | Ru1-N1                                      | 2.237  |
| Ru1-C7                                              | 1.904  | Ru1-C7                                      | 1.892  |
| C7-O1                                               | 1.152  | C7-O1                                       | 1.153  |
| C8-N1                                               | 1.155  |                                             |        |
| C8-C9                                               | 1.458  |                                             |        |
| Bond angles (°)                                     |        |                                             |        |
| Cl1-Ru1-Cl2                                         | 172.72 | Cl1-Ru1-Cl2                                 | 175.61 |
| P1-Ru1-N1                                           | 172.52 | P1-Ru1-N1                                   | 173.23 |
| P2-Ru1-C7                                           | 174.87 | P2-Ru1-C7                                   | 174.31 |
| P1-Ru1-P2                                           | 80.67  | P1-Ru1-P2                                   | 79.75  |
| Ru1-C7-O1                                           | 179.16 | Ru1-C7-O1                                   | 179.22 |
| Ru1-N1-C8                                           | 178.27 |                                             |        |
| N1-C8-C9                                            | 179.36 |                                             |        |

**Table S3** Selected bond lengths (Å) and bond angles (°) for [Ru(dppbz)<sub>2</sub>Cl<sub>2</sub>].

| Bond lengths (Å) |            |            |          |
|------------------|------------|------------|----------|
| Ru1-Cl1          | 2.4565(16) | P1-C1      | 1.821(3) |
| Ru1-P1           | 2.3944(6)  | C1-C2      | 1.394(4) |
| Ru1-P2           | 2.4042(6)  | C2-P2a     | 1.825(3) |
| Bond angles (°)  |            |            |          |
| Cl1-Ru1-Cl1a     | 180.00     | P2-Ru1-P2a | 180.00   |
| P1-Ru1-P1a       | 180.00     | P1-Ru1-P2  | 79.36(2) |



**Table S4** Selected bond lengths (Å) and bond angles (°) for [Ru(dppbz)(q)<sub>2</sub>].

| Bond lengths (Å) |            |           |           |
|------------------|------------|-----------|-----------|
| Ru1-P1           | 2.2499(13) | P1-C1     | 1.822(5)  |
| Ru1-P2           | 2.2479(13) | C1-C2     | 1.384(6)  |
| Ru1-O1           | 2.099(3)   | C2-P2     | 1.842(5)  |
| Ru1-O2           | 2.080(3)   | C13-O1    | 1.319(6)  |
| Ru1-N1           | 2.102(4)   | C22-O2    | 1.327(7)  |
| Ru1- N2          | 2.107(5)   |           |           |
| Bond angles (°)  |            |           |           |
| P1-Ru1-N1        | 179.34(10) | P1-Ru1-P2 | 83.95(5)  |
| P2-Ru1-N2        | 172.27(13) | O1-Ru1-N1 | 79.52(13) |
| O1-Ru1-O2        | 167.65(13) | O2-Ru1-N2 | 79.87(16) |

**Table S5** Selected bond lengths (Å) and bond angles (°) for [Ru(dppbz)(pic)<sub>2</sub>].

| Bond lengths (Å) |            |           |           |
|------------------|------------|-----------|-----------|
| Ru1-P1           | 2.2505(14) | P1-C1     | 1.828(6)  |
| Ru1-P2           | 2.2600(14) | C1-C2     | 1.386(8)  |
| Ru1-O1           | 2.087(4)   | C2-P2     | 1.829(6)  |
| Ru1-O3           | 2.083(4)   | C12-O1    | 1.290(8)  |
| Ru1-N1           | 2.111(4)   | C12-O2    | 1.237(9)  |
| Ru1- N2          | 2.101(4)   | C18-O3    | 1.294(9)  |
|                  |            | C18-O4    | 1.253(8)  |
| Bond angles (°)  |            |           |           |
| O1-Ru1-O3        | 167.32(14) | P1-Ru1-P2 | 83.83(5)  |
| P1-Ru1-N1        | 171.21(16) | O1-Ru1-N1 | 79.35(19) |
| P2-Ru1-N2        | 176.19(13) | O3-Ru1-N2 | 78.77(17) |

**Table S6** Computed parameters from TDDFT calculations on [Ru(dppbz)(CO)(dmsO)Cl<sub>2</sub>] for electronic spectral properties in dichloromethane solution.

| Excited state | Composition           | CI value | E(eV)  | Oscillator strength ( <i>f</i> ) | $\lambda_{\text{theo}}$ (nm) | Assignment                                                                                                               | $\lambda_{\text{exp}}$ (nm) |
|---------------|-----------------------|----------|--------|----------------------------------|------------------------------|--------------------------------------------------------------------------------------------------------------------------|-----------------------------|
| 1             | H-18 $\rightarrow$ L  | 0.10734  | 3.7598 | 0.0217                           | 329.76                       | ILCT/LLCT/MLCT<br>/LMCT<br>ILCT/MLCT<br>/LMCT<br>LLCT/LMCT<br>ILCT/LLCT/MLCT<br>/LMCT<br>LLCT/MLCT<br>/LMCT<br>LLCT/MLCT | 340                         |
|               | H-5 $\rightarrow$ L   | 0.15772  |        |                                  |                              |                                                                                                                          |                             |
|               | H-3 $\rightarrow$ L   | 0.23743  |        |                                  |                              |                                                                                                                          |                             |
|               | H-2 $\rightarrow$ L   | 0.49455  |        |                                  |                              |                                                                                                                          |                             |
|               | H $\rightarrow$ L     | 0.20547  |        |                                  |                              |                                                                                                                          |                             |
|               | H $\rightarrow$ L+2   | 0.20566  |        |                                  |                              |                                                                                                                          |                             |
| 2             | H-10 $\rightarrow$ L  | 0.11599  | 4.2144 | 0.0350                           | 294.19                       | ILCT/LMCT<br>ILCT/LLCT/MLCT<br>/LMCT<br>LLCT/LMCT<br>ILCT/LLCT/MLCT<br>/LMCT<br>ILCT/LLCT/MLCT<br>LLCT/MLCT<br>/LMCT     | 302                         |
|               | H-4 $\rightarrow$ L   | 0.58068  |        |                                  |                              |                                                                                                                          |                             |
|               | H-3 $\rightarrow$ L   | 0.24127  |        |                                  |                              |                                                                                                                          |                             |
|               | H-2 $\rightarrow$ L   | 0.15822  |        |                                  |                              |                                                                                                                          |                             |
|               | H-2 $\rightarrow$ L+2 | 0.11493  |        |                                  |                              |                                                                                                                          |                             |
|               | H $\rightarrow$ L     | 0.10291  |        |                                  |                              |                                                                                                                          |                             |
| 3             | H-7 $\rightarrow$ L   | 0.16237  | 4.6237 | 0.0279                           | 268.15                       | ILCT/LMCT<br>ILCT/LLCT/MLCT<br>ILCT/LLCT/MLCT<br>LLCT<br>ILCT/LLCT/MLCT<br>LLCT/MLCT<br>LLCT/MLCT/<br>LMCT               | 270                         |
|               | H-4 $\rightarrow$ L+1 | 0.13737  |        |                                  |                              |                                                                                                                          |                             |
|               | H-4 $\rightarrow$ L+2 | 0.42329  |        |                                  |                              |                                                                                                                          |                             |
|               | H-3 $\rightarrow$ L+2 | 0.30880  |        |                                  |                              |                                                                                                                          |                             |
|               | H-2 $\rightarrow$ L+2 | 0.25224  |        |                                  |                              |                                                                                                                          |                             |
|               | H $\rightarrow$ L+2   | 0.13803  |        |                                  |                              |                                                                                                                          |                             |
|               | H $\rightarrow$ L+3   | 0.15924  |        |                                  |                              |                                                                                                                          |                             |

**Table S7** Compositions of the molecular orbitals of [Ru(dppbz)(CO)(dmsO)Cl<sub>2</sub>] associated with the electronic spectral transitions.

| Molecular orbital | % Contribution of fragments |       |    |      |    |
|-------------------|-----------------------------|-------|----|------|----|
|                   | Ru                          | dppbz | CO | dmsO | Cl |
| HOMO(H)           | 32                          | 4     | 4  | 1    | 59 |
| H-2               | 16                          | 13    | 2  | 10   | 59 |
| H-3               | 4                           | 8     | 1  | 1    | 86 |
| H-4               | 14                          | 56    | 1  | 20   | 9  |
| H-5               | 11                          | 73    | 1  | 6    | 9  |
| H-7               | 6                           | 86    | 0  | 5    | 3  |
| H-10              | 2                           | 94    | 0  | 3    | 1  |
| H-18              | 30                          | 39    | 4  | 4    | 23 |
| LUMO(L)           | 27                          | 61    | 1  | 5    | 6  |
| L+1               | 7                           | 90    | 0  | 1    | 2  |
| L+2               | 2                           | 97    | 0  | 0    | 1  |
| L+3               | 38                          | 41    | 8  | 5    | 8  |

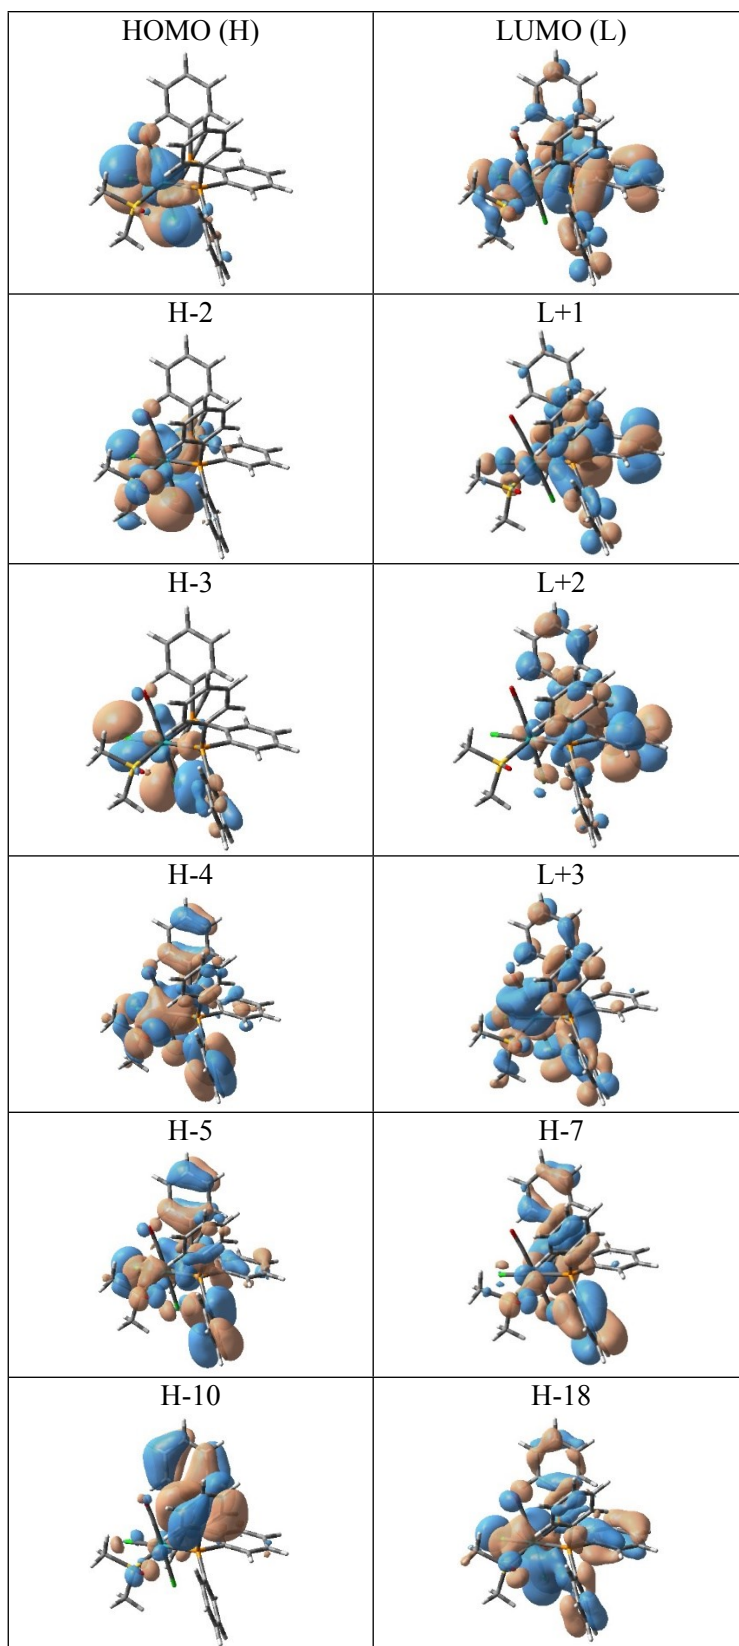

**Fig. S5** Contour plots of selected molecular orbitals of  $[\text{Ru}(\text{dppbz})(\text{CO})(\text{dmsO})\text{Cl}_2]$ .

**Table S8** Computed parameters from TDDFT calculations on [Ru(dppbz)(CO)(CH<sub>3</sub>CN)Cl<sub>2</sub>] for electronic spectral properties in dichloromethane solution.

| Excited state | Composition | CI value | E(eV)  | Oscillator strength ( <i>f</i> ) | $\lambda_{\text{theo}}$ (nm) | Assignment                                                                                   | $\lambda_{\text{exp}}$ (nm) |
|---------------|-------------|----------|--------|----------------------------------|------------------------------|----------------------------------------------------------------------------------------------|-----------------------------|
| 1             | H → L+1     | 0.49036  | 3.6494 | 0.0017                           | 339.74                       | LLCT/ILCT/MLCT<br>/LMCT<br>LLCT/MLCT<br>LLCT/MLCT<br>LLCT/MLCT                               | 356                         |
|               | H → L+2     | 0.32423  |        |                                  |                              |                                                                                              |                             |
|               | H → L+3     | 0.30759  |        |                                  |                              |                                                                                              |                             |
|               | H → L+13    | 0.11015  |        |                                  |                              |                                                                                              |                             |
| 2             | H → L+1     | 0.11661  | 4.1561 | 0.0074                           | 298.32                       | LLCT/ILCT/MLCT<br>/LMCT<br>LLCT/MLCT<br>LLCT/MLCT<br>LLCT/MLCT<br>LLCT/MLCT                  | 316                         |
|               | H → L+2     | 0.35991  |        |                                  |                              |                                                                                              |                             |
|               | H → L+3     | 0.52997  |        |                                  |                              |                                                                                              |                             |
|               | H → L+6     | 0.11029  |        |                                  |                              |                                                                                              |                             |
|               | H → L+9     | 0.11197  |        |                                  |                              |                                                                                              |                             |
| 3             | H-12 → L    | 0.10568  | 4.6578 | 0.0145                           | 266.18                       | LLCT/ILCT<br>LLCT/ILCT/MLCT<br>ILCT/MLCT<br>LLCT/ILCT<br>ILCT/MLCT<br>LLCT/ILCT<br>LLCT/MLCT | 268                         |
|               | H-8 → L     | 0.17308  |        |                                  |                              |                                                                                              |                             |
|               | H-7 → L     | 0.18918  |        |                                  |                              |                                                                                              |                             |
|               | H-5 → L     | 0.38601  |        |                                  |                              |                                                                                              |                             |
|               | H-4 → L     | 0.37512  |        |                                  |                              |                                                                                              |                             |
|               | H-2 → L     | 0.19336  |        |                                  |                              |                                                                                              |                             |
|               | H → L+5     | 0.11095  |        |                                  |                              |                                                                                              |                             |

**Table S9** Compositions of the molecular orbitals of [Ru(dppbz)(CO)(CH<sub>3</sub>CN)Cl<sub>2</sub>] associated with the electronic spectral transitions.

| Molecular orbital | % Contribution of fragments |       |    |                    |    |
|-------------------|-----------------------------|-------|----|--------------------|----|
|                   | Ru                          | dppbz | CO | CH <sub>3</sub> CN | Cl |
| HOMO(H)           | 47                          | 3     | 0  | 2                  | 48 |
| H-2               | 8                           | 25    | 4  | 1                  | 62 |
| H-4               | 14                          | 78    | 2  | 2                  | 4  |
| H-5               | 8                           | 80    | 1  | 1                  | 10 |
| H-7               | 19                          | 73    | 2  | 2                  | 4  |
| H-8               | 23                          | 62    | 2  | 2                  | 11 |
| H-12              | 3                           | 84    | 0  | 1                  | 12 |
| LUMO(L)           | 5                           | 92    | 1  | 1                  | 1  |
| L+1               | 43                          | 33    | 1  | 3                  | 20 |
| L+2               | 8                           | 87    | 3  | 1                  | 1  |
| L+3               | 9                           | 87    | 2  | 1                  | 1  |
| L+5               | 2                           | 96    | 1  | 1                  | 0  |
| L+6               | 4                           | 92    | 2  | 1                  | 1  |
| L+9               | 8                           | 65    | 16 | 11                 | 0  |
| L+13              | 2                           | 12    | 4  | 82                 | 0  |

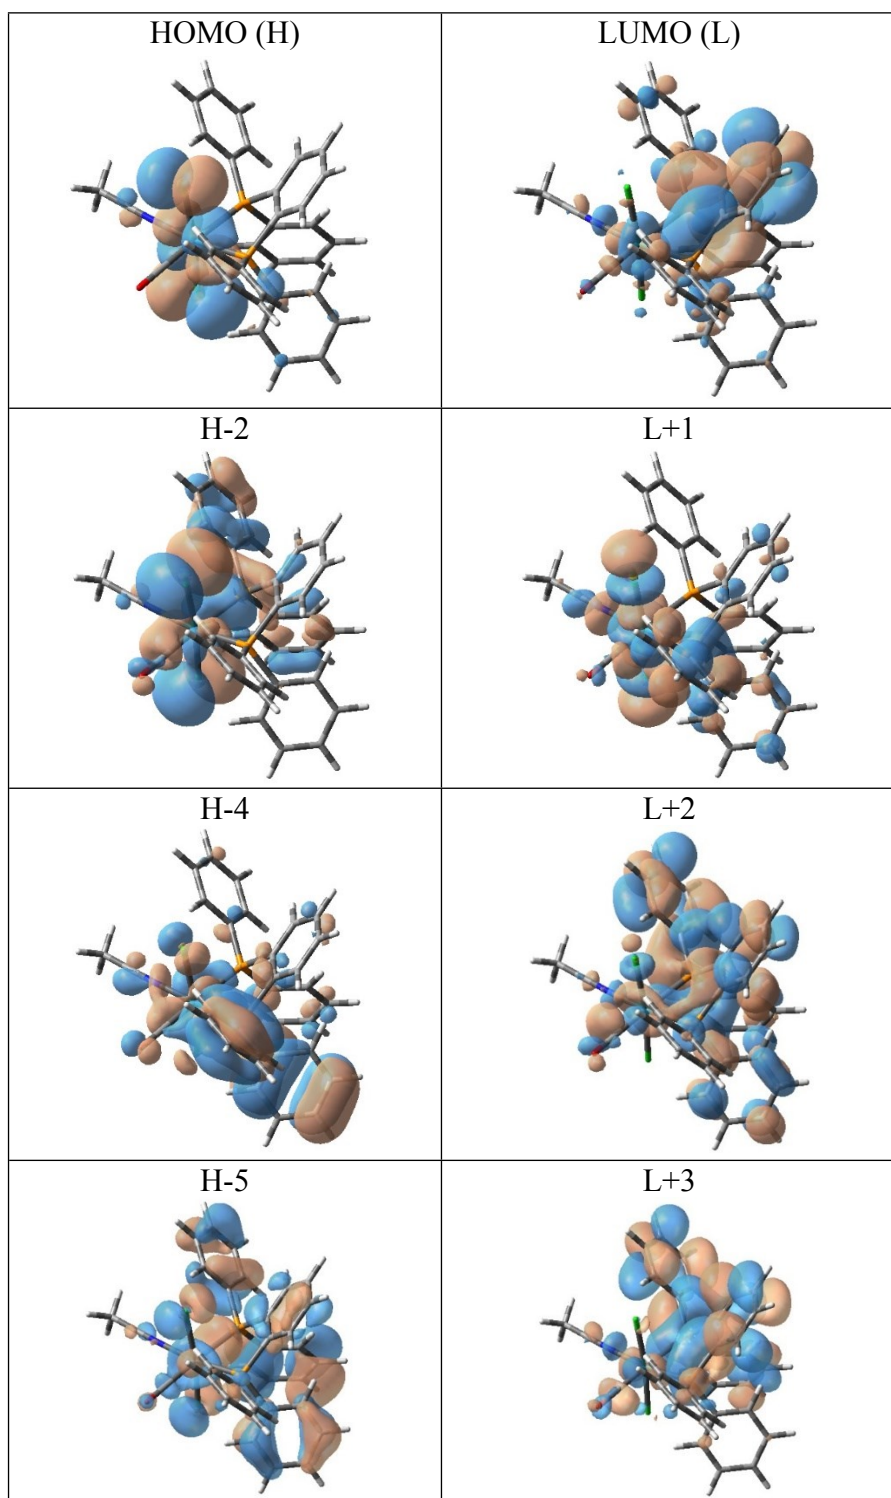



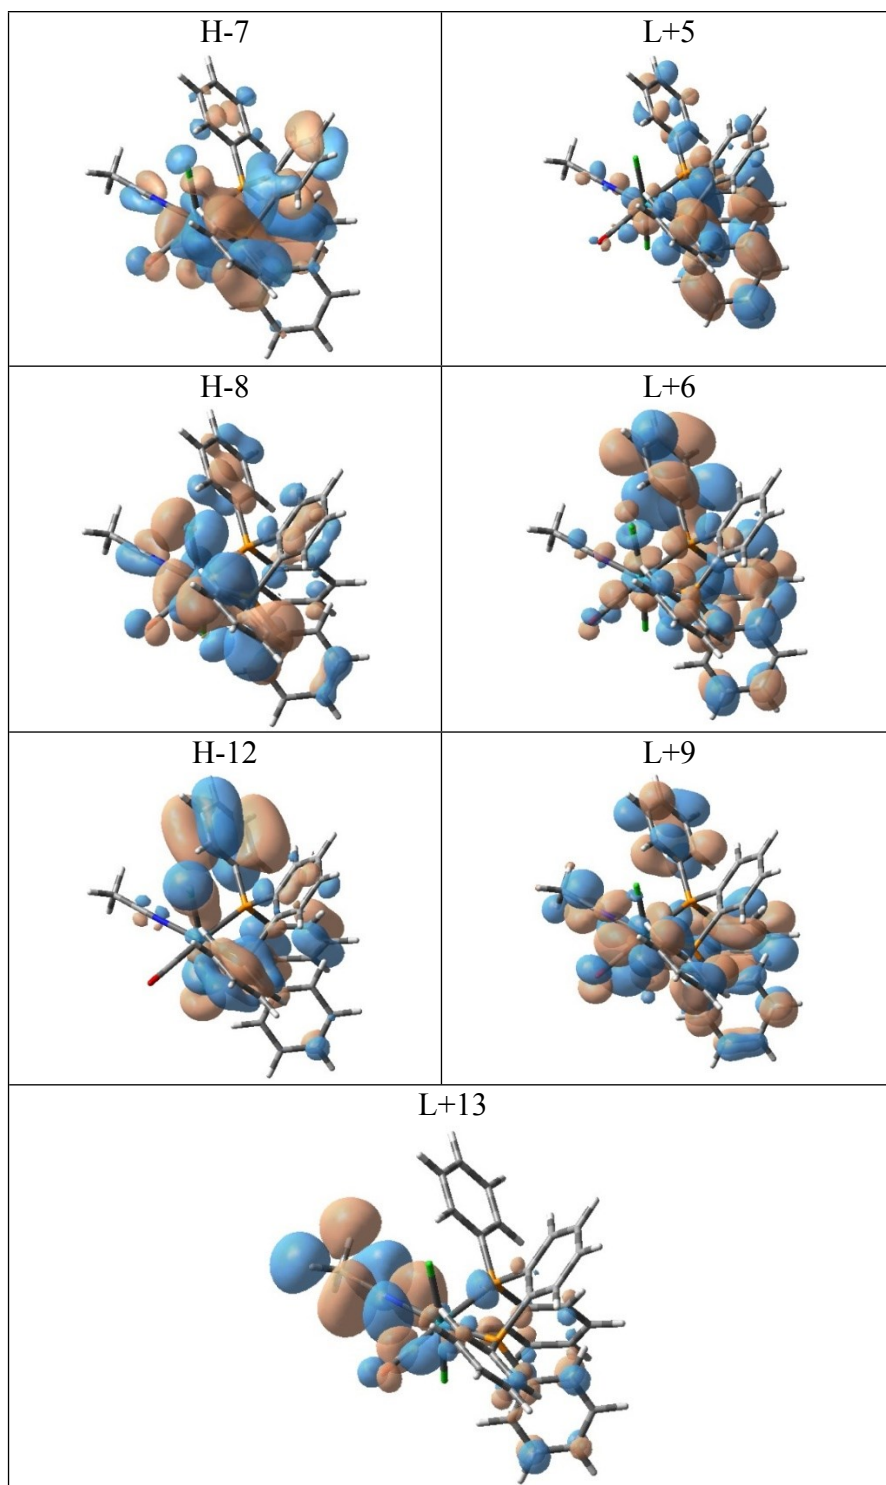

**Fig. S6** Contour plots of selected molecular orbitals of  $[\text{Ru}(\text{dppbz})(\text{CO})(\text{CH}_3\text{CN})\text{Cl}_2]$ .

**Table S10** Computed parameters from TDDFT calculations on [Ru(dppbz)(CO)(4-picoline)Cl<sub>2</sub>] for electronic spectral properties in dichloromethane solution.

| Excited state | Composition | CI value | E(eV)  | Oscillator strength ( <i>f</i> ) | $\lambda_{\text{theo}}$ (nm) | Assignment                                                                                                                                                                                                  | $\lambda_{\text{exp}}$ (nm) |
|---------------|-------------|----------|--------|----------------------------------|------------------------------|-------------------------------------------------------------------------------------------------------------------------------------------------------------------------------------------------------------|-----------------------------|
| 1             | H → L+1     | 0.57979  | 3.5210 | 0.0010                           | 352.13                       | LLCT/MLCT<br>/LMCT<br>LLCTMLCT<br>LLCT/MLCT<br>LLCT/MLCT<br>LLCT/MLCT<br>/LMCT                                                                                                                              | 363                         |
|               | H → L+3     | 0.24482  |        |                                  |                              |                                                                                                                                                                                                             |                             |
|               | H → L+4     | 0.18434  |        |                                  |                              |                                                                                                                                                                                                             |                             |
|               | H → L+5     | 0.10941  |        |                                  |                              |                                                                                                                                                                                                             |                             |
|               | H → L+15    | 0.12413  |        |                                  |                              |                                                                                                                                                                                                             |                             |
| 2             | H → L+1     | 0.17324  | 3.9611 | 0.0224                           | 313.01                       | LLCT/MLCT<br>/LMCT<br>LLCT/MLCT<br>/LMCT                                                                                                                                                                    | 307                         |
|               | H → L+2     | 0.65465  |        |                                  |                              |                                                                                                                                                                                                             |                             |
| 3             | H-11 → L    | 0.15677  | 4.7158 | 0.0529                           | 262.91                       | LLCT/ILCT<br>LLCT/ILCT<br>LLCT/ILCT<br>LLCT/ILCT/MLCT/<br>LMCT<br>LLCT/ILCT<br>LLCT/ILCT/MLCT/<br>LMCT<br>LLCT/ILCT/MLCT/<br>LMCT<br>LLCT/MLCT<br>/LMCT<br>LLCT/MLCT<br>LLCT/MLCT<br>LLCT/MLCT<br>LLCT/MLCT | 269                         |
|               | H-10 → L    | 0.11479  |        |                                  |                              |                                                                                                                                                                                                             |                             |
|               | H-8 → L     | 0.19813  |        |                                  |                              |                                                                                                                                                                                                             |                             |
|               | H-4 → L+1   | 0.10486  |        |                                  |                              |                                                                                                                                                                                                             |                             |
|               | H-3 → L     | 0.15915  |        |                                  |                              |                                                                                                                                                                                                             |                             |
|               | H-2 → L+1   | 0.31018  |        |                                  |                              |                                                                                                                                                                                                             |                             |
|               | H-2 → L+3   | 0.10239  |        |                                  |                              |                                                                                                                                                                                                             |                             |
|               | H-1 → L+5   | 0.13393  |        |                                  |                              |                                                                                                                                                                                                             |                             |
|               | H-1 → L+6   | 0.28398  |        |                                  |                              |                                                                                                                                                                                                             |                             |
|               | H-1 → L+7   | 0.13640  |        |                                  |                              |                                                                                                                                                                                                             |                             |
|               | H-1 → L+9   | 0.10839  |        |                                  |                              |                                                                                                                                                                                                             |                             |
|               | H-1 → L+12  | 0.13624  |        |                                  |                              |                                                                                                                                                                                                             |                             |
|               | H → L+8     | 0.10219  |        |                                  |                              |                                                                                                                                                                                                             |                             |

**Table S11** Compositions of the molecular orbitals of [Ru(dppbz)(CO)(4-picoline)Cl<sub>2</sub>] associated with the electronic spectral transitions.

| Molecular orbital | % Contribution of fragments |       |    |            |    |
|-------------------|-----------------------------|-------|----|------------|----|
|                   | Ru                          | dppbz | CO | 4-picoline | Cl |
| HOMO(H)           | 54                          | 3     | 0  | 2          | 41 |
| H-1               | 43                          | 3     | 3  | 0          | 51 |
| H-2               | 18                          | 37    | 5  | 3          | 37 |
| H-3               | 10                          | 30    | 1  | 3          | 56 |
| H-4               | 23                          | 63    | 2  | 6          | 6  |
| H-8               | 1                           | 86    | 0  | 1          | 12 |
| H-10              | 8                           | 82    | 0  | 1          | 9  |
| H-11              | 4                           | 79    | 0  | 1          | 16 |
| LUMO(L)           | 8                           | 55    | 1  | 36         | 0  |
| L+1               | 21                          | 29    | 1  | 41         | 8  |
| L+2               | 23                          | 49    | 1  | 18         | 9  |
| L+3               | 12                          | 70    | 5  | 9          | 4  |
| L+4               | 5                           | 86    | 2  | 7          | 0  |
| L+5               | 12                          | 80    | 4  | 1          | 3  |
| L+6               | 2                           | 62    | 1  | 35         | 0  |
| L+7               | 1                           | 52    | 0  | 47         | 0  |
| L+8               | 4                           | 94    | 1  | 0          | 1  |
| L+9               | 6                           | 90    | 1  | 2          | 1  |
| L+12              | 4                           | 83    | 12 | 1          | 0  |
| L+15              | 20                          | 41    | 38 | 1          | 0  |

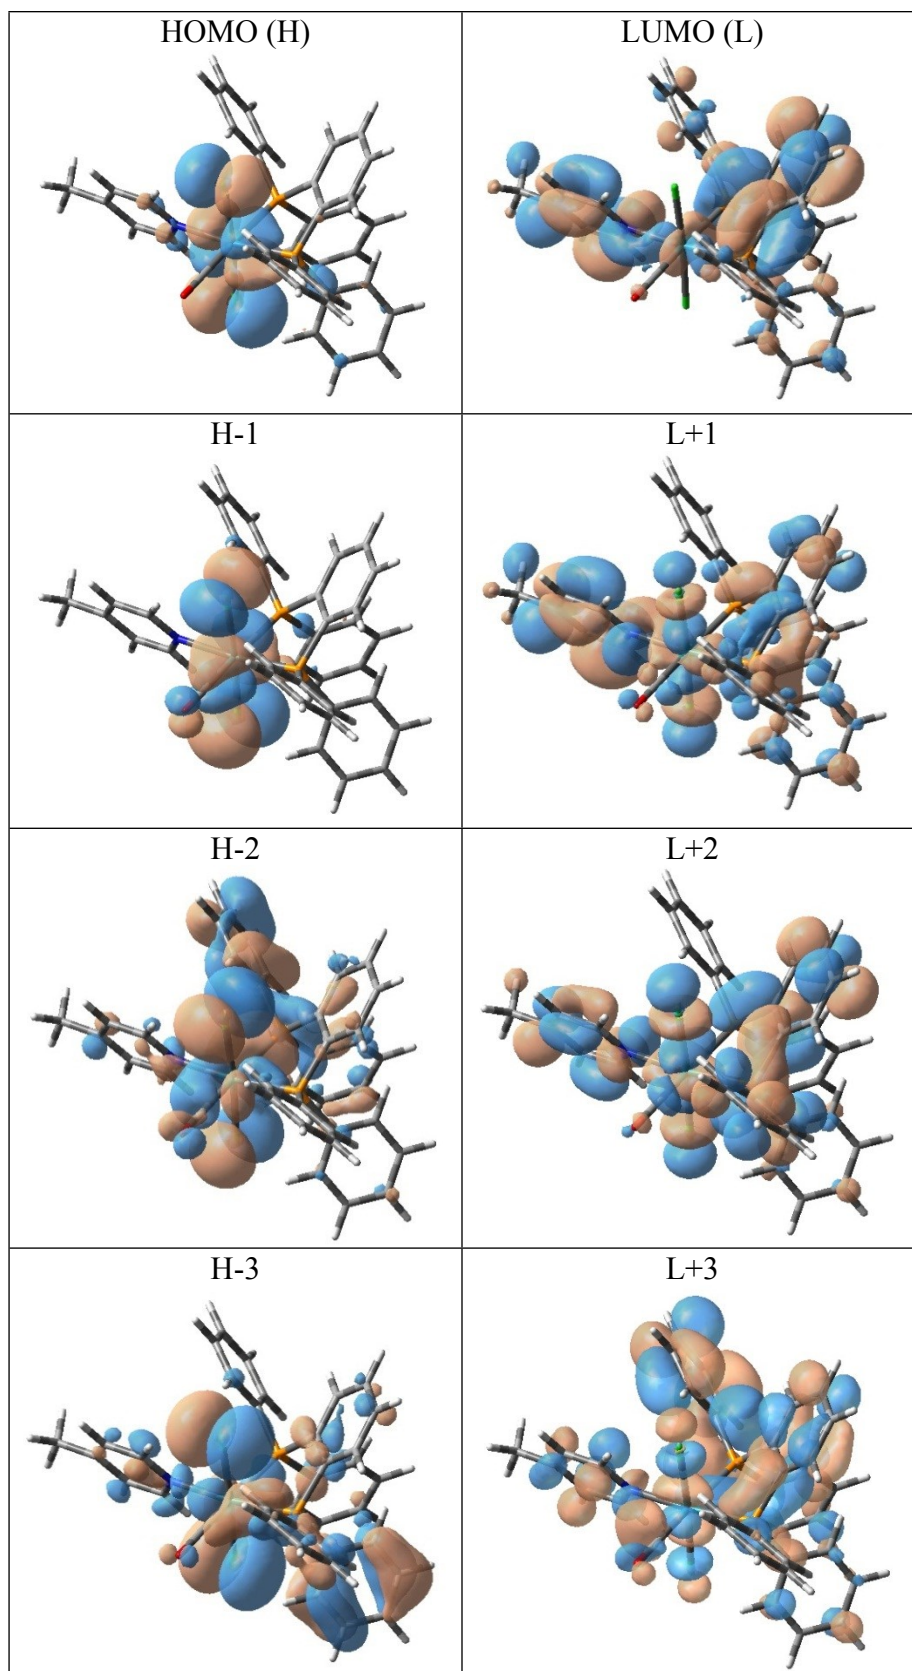

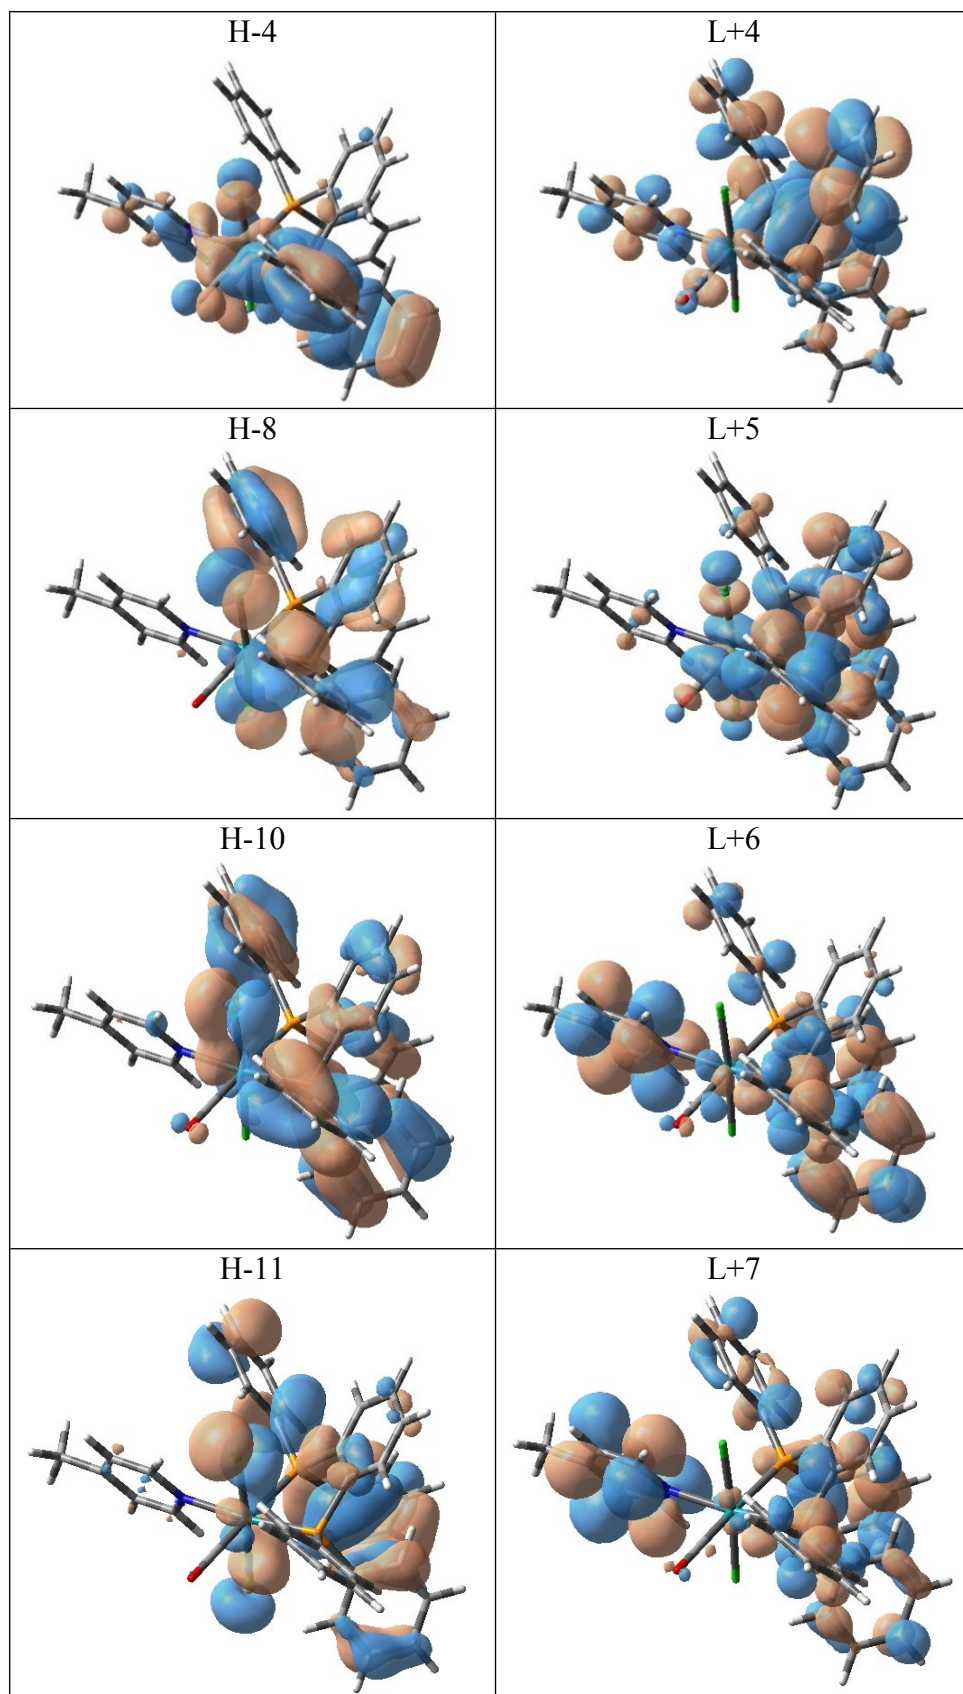

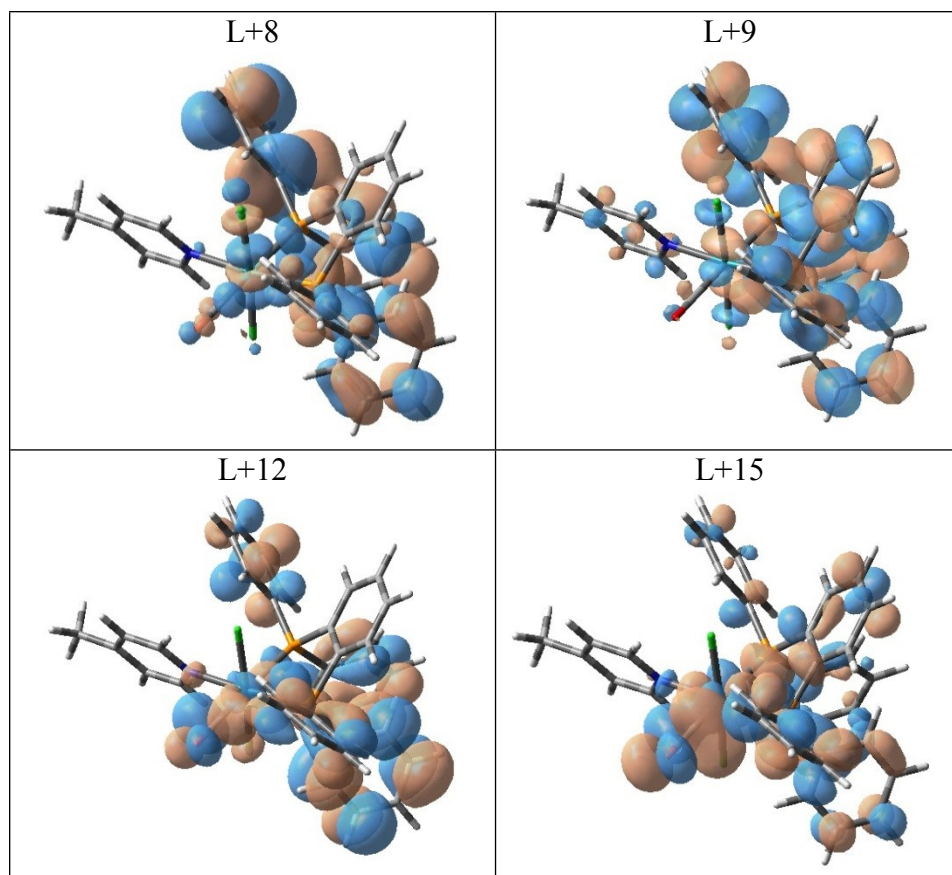

**Fig. S7** Contour plots of selected molecular orbitals of  $[\text{Ru}(\text{dppbz})(\text{CO})(4\text{-picoline})\text{Cl}_2]$ .

**Table S12** Computed parameters from TDDFT calculations on [Ru(dppbz)<sub>2</sub>Cl<sub>2</sub>] for electronic spectral properties in dichloromethane solution.

| Excited state | Composition            | CI value           | E(eV)  | Oscillator strength ( <i>f</i> ) | $\lambda_{\text{theo}}$ (nm) | Assignment                  | $\lambda_{\text{exp}}$ (nm) |
|---------------|------------------------|--------------------|--------|----------------------------------|------------------------------|-----------------------------|-----------------------------|
| 1             | H → L+2                | 0.70500            | 3.6379 | 0.0016                           | 340.81                       | MLCT/LLCT                   | 370                         |
| 2             | H-2 → L+1<br>H-2 → L+4 | 0.67116<br>0.12039 | 4.1330 | 0.1517                           | 299.99                       | ILCT/LMCT/LLCT<br>ILCT/LLCT | 313                         |
| 3             | H-5 → L<br>H-4 → L     | 0.10891<br>0.68388 | 4.4365 | 0.2226                           | 279.47                       | ILCT/LMCT<br>LLCT/ILCT/LMCT | 276                         |

**Table S13** Compositions of the molecular orbitals of [Ru(dppbz)<sub>2</sub>Cl<sub>2</sub>] associated with the electronic spectral transitions.

| to      | % Contribution of fragments |       |    |
|---------|-----------------------------|-------|----|
|         | Ru                          | dppbz | Cl |
| HOMO(H) | 61                          | 5     | 34 |
| H-2     | 2                           | 62    | 36 |
| H-3     | 81                          | 19    | 0  |
| H-4     | 1                           | 32    | 67 |
| H-5     | 6                           | 88    | 6  |
| LUMO(L) | 22                          | 78    | 0  |
| L+1     | 21                          | 71    | 8  |
| L+2     | 1                           | 99    | 0  |
| L+4     | 2                           | 98    | 0  |

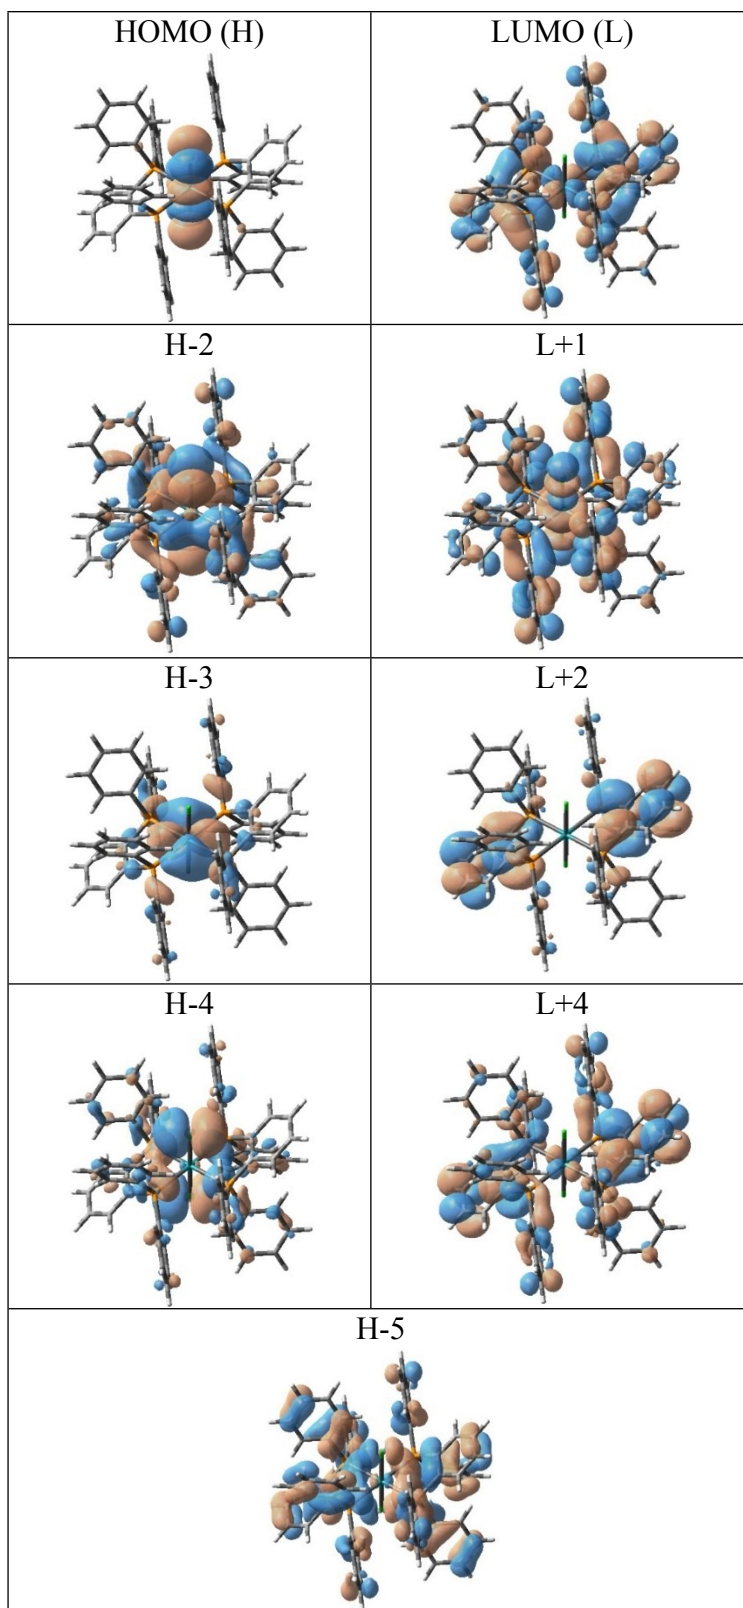

**Fig. S8** Contour plots of selected molecular orbitals of  $[\text{Ru}(\text{dppbz})_2\text{Cl}_2]$ .



**Table S14** Computed parameters from TDDFT calculations on [Ru(dppbz)(q)<sub>2</sub>] for electronic spectral properties in dichloromethane solution.

| Excited state | Composition                                                                                       | CI value                                                                             | E(eV)  | Oscillator strength ( <i>f</i> ) | $\lambda_{\text{theo}}$ (nm) | Assignment                                                                                 | $\lambda_{\text{exp}}$ (nm) |
|---------------|---------------------------------------------------------------------------------------------------|--------------------------------------------------------------------------------------|--------|----------------------------------|------------------------------|--------------------------------------------------------------------------------------------|-----------------------------|
| 1             | H-2 → L<br>H → L                                                                                  | 0.13894<br>0.66941                                                                   | 2.6380 | 0.0382                           | 669.99                       | ILCT/MLCT<br>ILCT/MLCT                                                                     | 686                         |
| 2             | H → L+1                                                                                           | 0.68746                                                                              | 2.6806 | 0.0616                           | 462.53                       | ILCT/MLCT                                                                                  | 475                         |
| 3             | H-2 → L<br>H-1 → L+3<br>H-1 → L+4                                                                 | 0.55180<br>0.39384<br>0.13598                                                        | 3.4049 | 0.0824                           | 364.13                       | MLCT/ILCT<br>LLCT/MLCT<br>ILCT/LLCT/MLCT<br>/LMCT                                          | 366                         |
| 4             | H-15 → L<br>H-12 → L+1<br>H-11 → L<br>H-9 → L+1<br>H-8 → L<br>H-7 → L+1<br>H-3 → L+10<br>H → L+16 | 0.28846<br>0.15798<br>0.19934<br>0.18309<br>0.24883<br>0.36831<br>0.14209<br>0.13248 | 5.0175 | 0.1134                           | 247.11                       | ILCT/LLCT/MLCT<br>LLCT<br>LLCT<br>LLCT<br>ILCT/LLCT<br>ILCT/LLCT<br>LLCT/MLCT<br>ILCT/MLCT | 248                         |

**Table 15** Compositions of the molecular orbitals of [Ru(dppbz)(q)<sub>2</sub>] associated with the electronic spectral transitions.

| Molecular orbital | % Contribution of fragments |       |    |
|-------------------|-----------------------------|-------|----|
|                   | Ru                          | dppbz | q  |
| HOMO(H)           | 28                          | 2     | 70 |
| H-1               | 25                          | 2     | 73 |
| H-2               | 68                          | 7     | 25 |
| H-3               | 48                          | 6     | 46 |
| H-7               | 0                           | 9     | 91 |
| H-8               | 5                           | 73    | 22 |
| H-9               | 0                           | 99    | 1  |
| H-11              | 0                           | 94    | 6  |
| H-12              | 0                           | 96    | 4  |
| H-15              | 11                          | 18    | 71 |
| LUMO(L)           | 3                           | 5     | 92 |
| L+1               | 1                           | 1     | 98 |
| L+3               | 1                           | 98    | 1  |
| L+4               | 13                          | 82    | 5  |
| L+10              | 1                           | 92    | 7  |
| L+16              | 3                           | 2     | 95 |

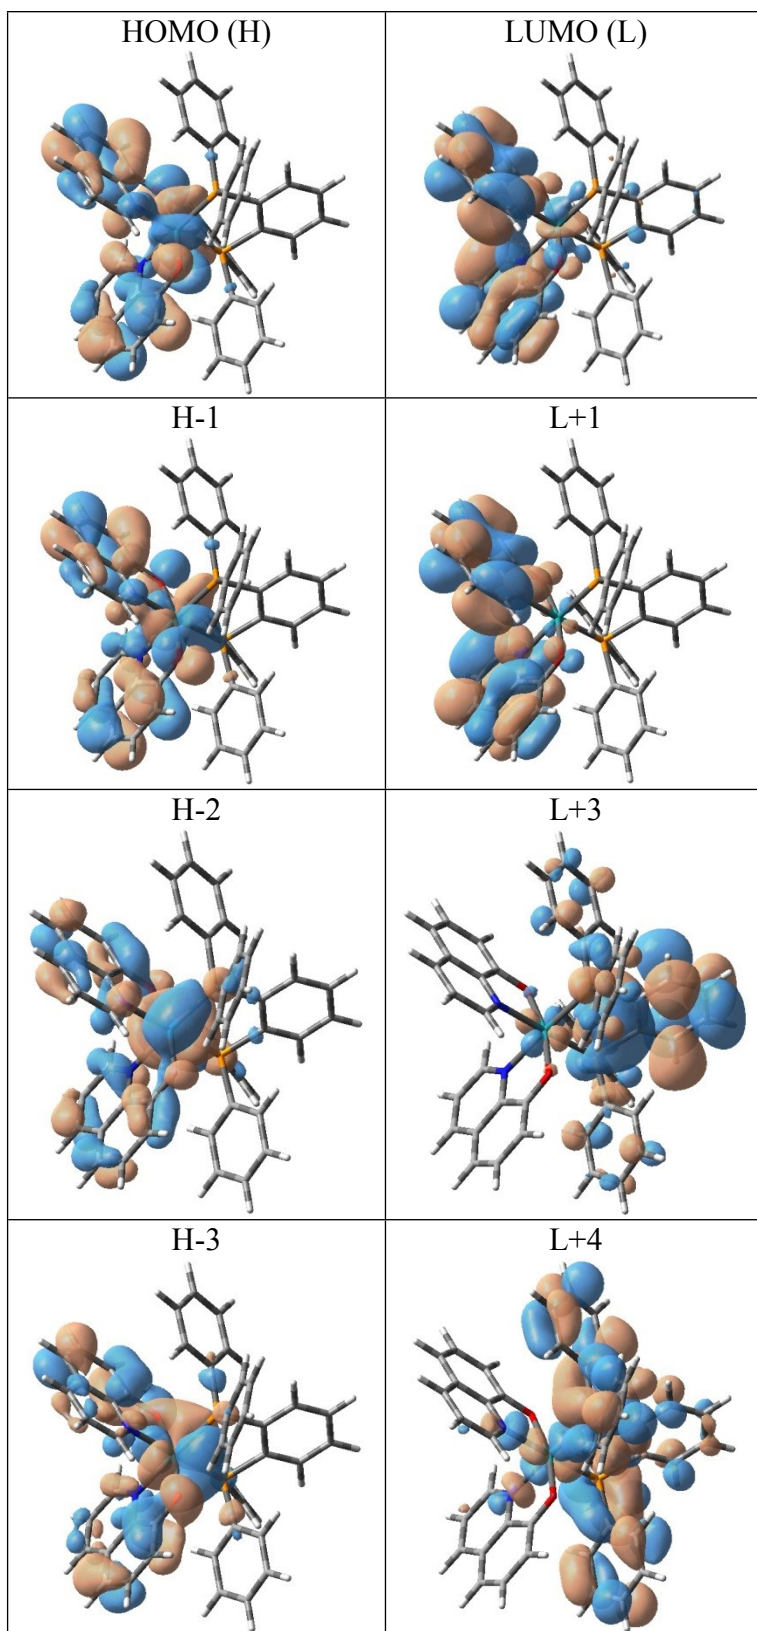

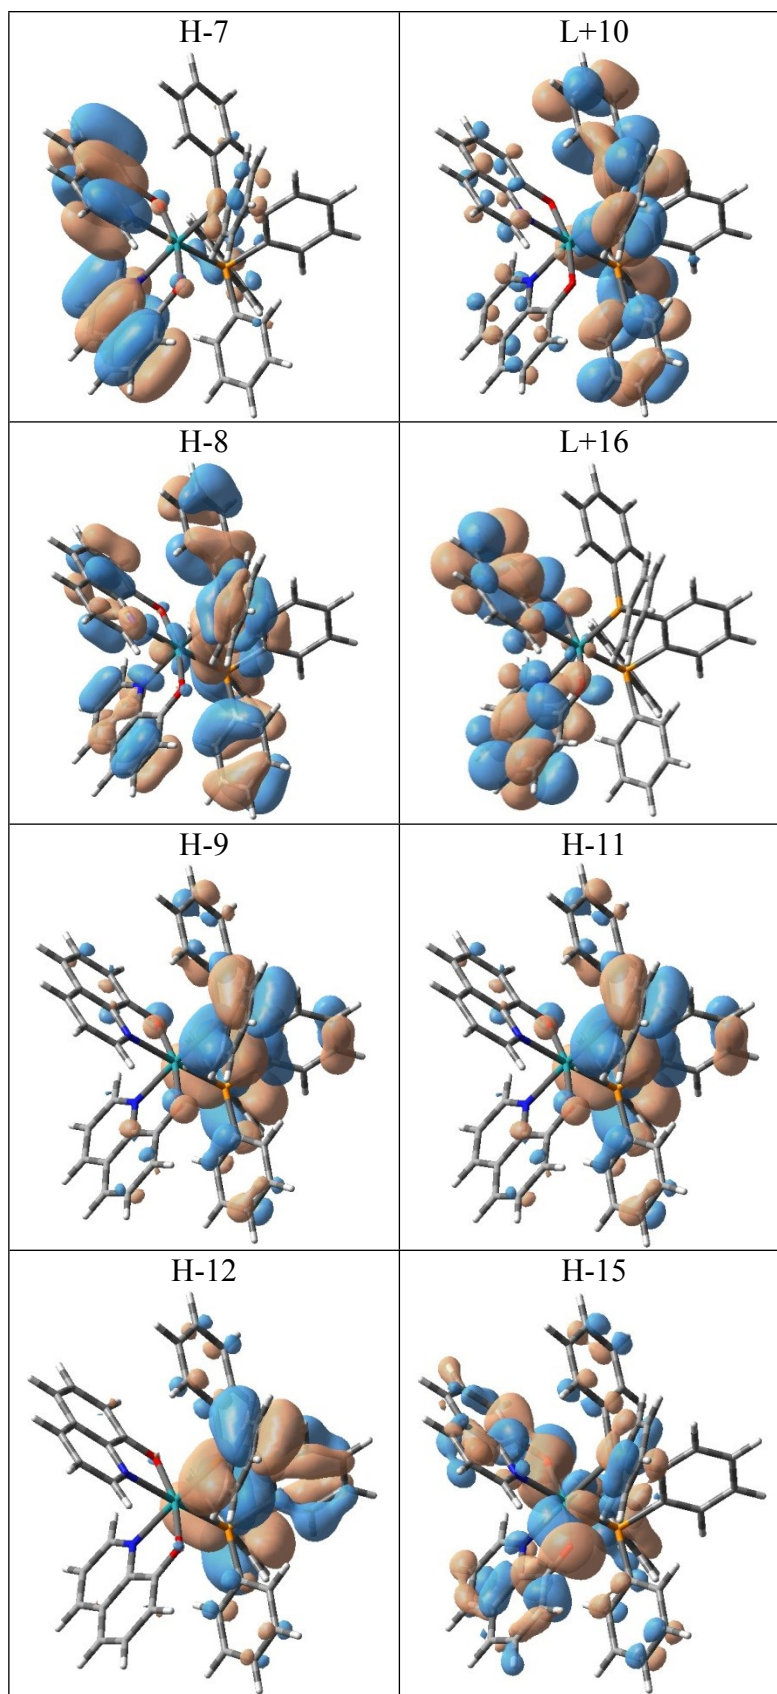

**Fig. S9** Contour plots of selected molecular orbitals of  $[\text{Ru}(\text{dppbz})(\text{q})_2]$ .

**Table S16** Computed parameters from TDDFT calculations on [Ru(dppbz)(pic)<sub>2</sub>] for electronic spectral properties in dichloromethane solution.

| Excited state | Composition                                                                                                    | CI value                                                                                     | E(eV)  | Oscillator strength ( <i>f</i> ) | $\lambda_{\text{theo}}$ (nm) | Assignment                                                                                                                                     | $\lambda_{\text{exp}}$ (nm) |
|---------------|----------------------------------------------------------------------------------------------------------------|----------------------------------------------------------------------------------------------|--------|----------------------------------|------------------------------|------------------------------------------------------------------------------------------------------------------------------------------------|-----------------------------|
| 1             | H-1 → L<br>H → L                                                                                               | 0.10339<br>0.65840                                                                           | 2.9754 | 0.0121                           | 416.70                       | MLCT/ILCT<br>MLCT/ILCT                                                                                                                         | 432                         |
| 2             | H-2 → L+1<br>H-1 → L+2<br>H-1 → L+3<br>H → L+2<br>H → L+4                                                      | 0.59390<br>0.12226<br>0.13900<br>0.11525<br>0.24835                                          | 3.6217 | 0.1081                           | 342.34                       | MLCT/ILCT/LLCT<br>LLCT/MLCT<br>ILCT/LLCT/MLCT<br>LLCT/MLCT<br>ILCT/LLCT/MLCT                                                                   | 343                         |
| 3             | H-4 → L+3<br>H-3 → L+2<br>H-3 → L+3<br>H-2 → L+8<br>H-2 → L+14<br><br>H-1 → L+13<br>H-1 → L+15<br><br>H → L+15 | 0.10634<br>0.44126<br>0.19380<br>0.12962<br>0.11793<br><br>0.23401<br>0.20847<br><br>0.12474 | 4.8828 | 0.0265                           | 253.92                       | ILCT/LLCT<br>LLCT<br>ILCT/LLCT<br>ILCT/LLCT/MLCT<br>ILCT/LLCT/MLCT<br>/LMCT<br>LLCT/MLCT<br>ILCT/LLCT/MLCT<br>/LMCT<br>ILCT/LLCT/MLCT<br>/LMCT | 259                         |

**Table S17** Compositions of the molecular orbitals of [Ru(dppbz)(pic)<sub>2</sub>] associated with the electronic spectral transitions.

| Molecular orbital | % Contribution of fragments |       |     |
|-------------------|-----------------------------|-------|-----|
|                   | Ru                          | dppbz | pic |
| HOMO(H)           | 72                          | 4     | 24  |
| H-1               | 69                          | 6     | 25  |
| H-2               | 74                          | 12    | 14  |
| H-3               | 2                           | 4     | 94  |
| H-4               | 3                           | 3     | 94  |
| LUMO(L)           | 1                           | 0     | 99  |
| L+1               | 4                           | 4     | 92  |
| L+2               | 2                           | 97    | 1   |
| L+3               | 1                           | 83    | 16  |
| L+4               | 1                           | 17    | 82  |
| L+8               | 8                           | 88    | 4   |
| L+13              | 1                           | 99    | 0   |
| L+14              | 55                          | 27    | 18  |
| L+15              | 36                          | 54    | 10  |

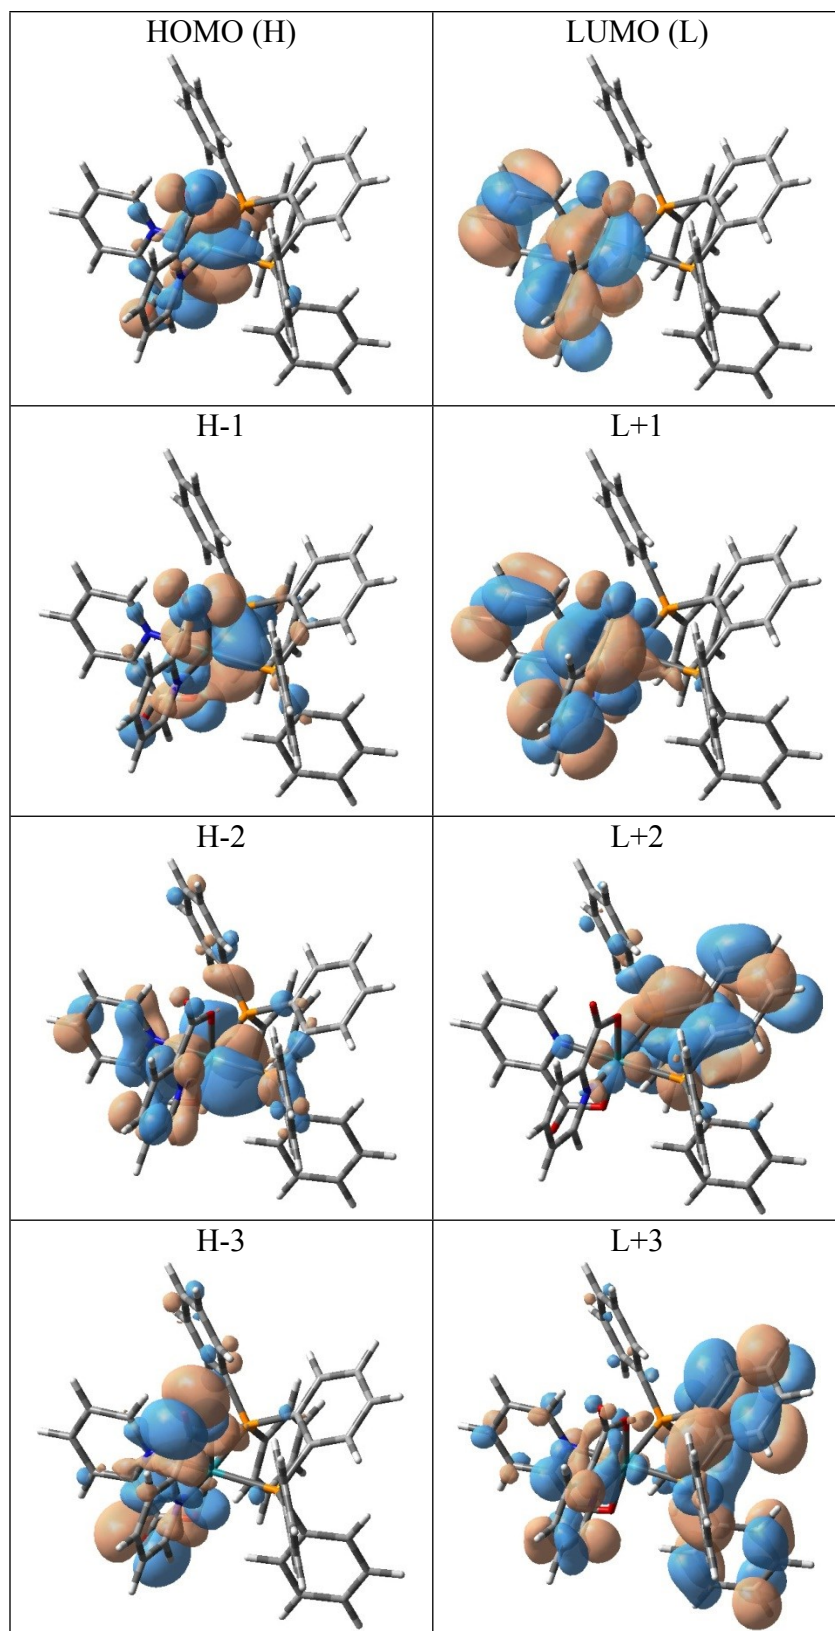

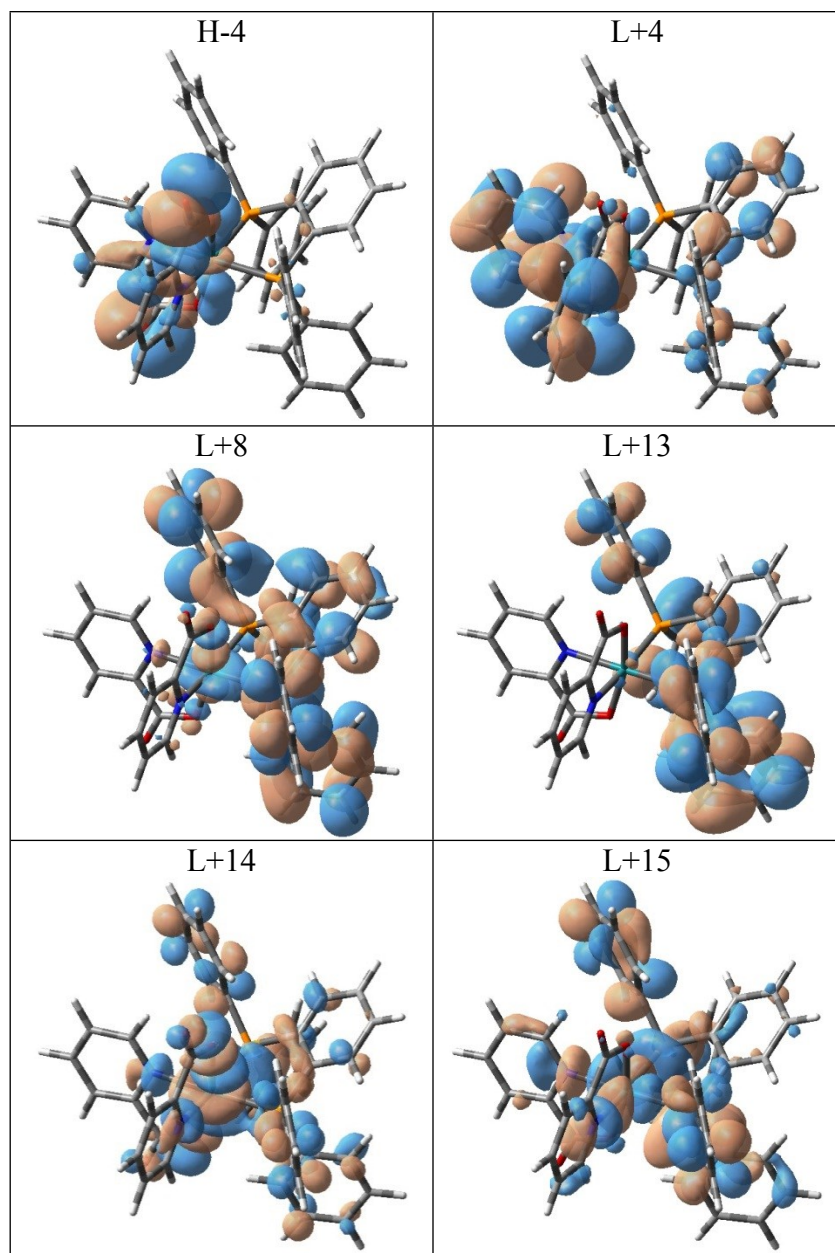

**Fig. S10** Contour plots of selected molecular orbitals of [Ru(dppbz)(pic)<sub>2</sub>].

**Table S18.** Screening of experimental conditions.<sup>a</sup>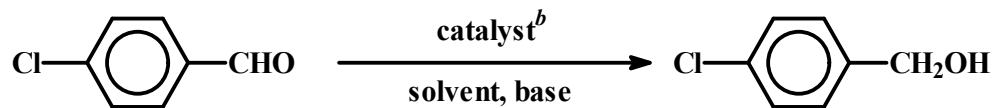

| Entry | Solvent    | Mole % of catalyst | Base                           | Temperature, °C | Time, h | Yield <sup>c</sup> % |
|-------|------------|--------------------|--------------------------------|-----------------|---------|----------------------|
| 1     | 1-propanol | 0.02               | KO <sup>t</sup> Bu             | 95              | 6       | 99                   |
| 2     | 1-propanol | 0.01               | KO <sup>t</sup> Bu             | 95              | 6       | 68                   |
| 3     | 1-propanol | 0.01               | KO <sup>t</sup> Bu             | 95              | 10      | 62                   |
| 4     | 1-propanol | 0.02               | KO <sup>t</sup> Bu             | 95              | 5       | 89                   |
| 5     | 1-propanol | -                  | KO <sup>t</sup> Bu             | 95              | 6       | NO <sup>d</sup>      |
| 6     | 1-propanol | 0.02               | -                              | 95              | 6       | NO <sup>d</sup>      |
| 7     | 1-propanol | 0.02               | KOH                            | 95              | 6       | 16                   |
| 8     | 1-propanol | 0.02               | K <sub>3</sub> PO <sub>4</sub> | 95              | 6       | NO <sup>d</sup>      |
| 9     | 1-propanol | 0.02               | KO <sup>t</sup> Bu             | 50              | 6       | 32                   |
| 10    | 2-propanol | 0.02               | KO <sup>t</sup> Bu             | 80              | 6       | 85                   |
| 11    | ethanol    | 0.02               | KO <sup>t</sup> Bu             | 75              | 6       | 63                   |

<sup>a</sup> Reaction conditions: 4-chlorobenzaldehyde (1.0 mmol), base (0.2 mol%), solvent (4.0 mL).

<sup>b</sup> Catalyst: [Ru(dppbz)(CO)<sub>2</sub>Cl<sub>2</sub>].

<sup>c</sup> Yields are determined by GCMS based on the quantity of substrate remaining after the reaction. Besides the substrate and the reported product, no other species was detected in any of the reactions.

<sup>d</sup> Not observed.

Table S19. Screening of experimental conditions.<sup>a</sup>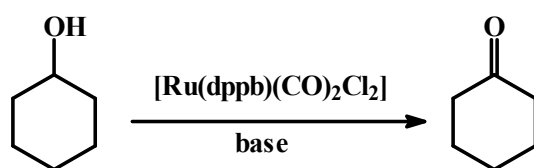

| Entry | Solvent         | Mole % of catalyst | Base                           | Temperature, °C | Time, h | Yield <sup>b</sup> , % |
|-------|-----------------|--------------------|--------------------------------|-----------------|---------|------------------------|
| 1     | Toluene/Acetone | 0.1                | KO <sup>t</sup> Bu             | 100             | 6       | 91                     |
| 2     | Toluene/Acetone | -                  | KO <sup>t</sup> Bu             | 100             | 6       | NO <sup>c</sup>        |
| 3     | Toluene/Acetone | 0.1                | KO <sup>t</sup> Bu             | 100             | 4       | 69                     |
| 4     | Toluene/Acetone | 0.05               | KO <sup>t</sup> Bu             | 100             | 6       | 41                     |
| 5     | Toluene/Acetone | 0.2                | KO <sup>t</sup> Bu             | 100             | 6       | 94                     |
| 6     | Toluene/Acetone | 0.1                | KO <sup>t</sup> Bu             | 100             | 8       | 63                     |
| 7     | Toluene/Acetone | 0.1                | -                              | 100             | 6       | NO <sup>c</sup>        |
| 8     | Toluene/Acetone | 0.1                | KOH                            | 100             | 6       | 6                      |
| 9     | Toluene/Acetone | 0.1                | K <sub>3</sub> PO <sub>4</sub> | 100             | 6       | NO <sup>c</sup>        |
| 10    | Toluene/Acetone | 0.1                | CsCO <sub>3</sub>              | 100             | 6       | 5                      |
| 11    | Toluene/Acetone | 0.1                | KO <sup>t</sup> Bu             | 60              | 6       | 39                     |
| 12    | Toluene         | 0.1                | KO <sup>t</sup> Bu             | 100             | 6       | 7                      |
| 13    | Acetone         | 0.1                | KO <sup>t</sup> Bu             | 100             | 6       | 68                     |

<sup>a</sup> Reaction conditions: cyclohexanol (1.0 mmol), solvent (5.0 mL), base (0.25 mol%).

<sup>b</sup> Yields are determined by GCMS based on the quantity of substrate remaining after the reaction. Besides the substrate and the reported product, no other species was detected in any of the reactions.

<sup>c</sup> Not observed.



**Table S20.** Screening of experimental conditions.<sup>a</sup>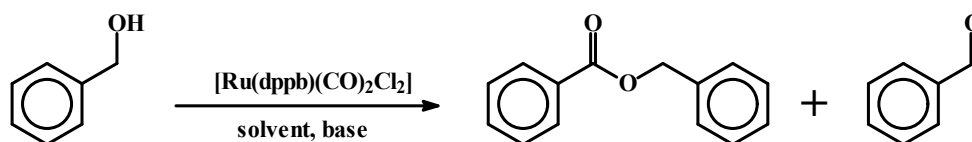

| Entry | Solvent             | Mole % of catalyst | Base                           | Temperature, °C | Time, h | Yield <sup>b</sup> , (ester) % | Yield <sup>b</sup> , (aldehyde) % |
|-------|---------------------|--------------------|--------------------------------|-----------------|---------|--------------------------------|-----------------------------------|
| 1     | 3:2 Toluene-Acetone | 0.1                | KO <sup>t</sup> Bu             | 100             | 6       | 75                             | 10                                |
| 2     | 3:2 Toluene-Acetone | 0.1                | KO <sup>t</sup> Bu             | 100             | 8       | 75                             | 12                                |
| 3     | 3:2 Toluene-Acetone | 0.1                | KO <sup>t</sup> Bu             | 100             | 4       | 58                             | 16                                |
| 4     | 3:2 Toluene-Acetone | 0.2                | KO <sup>t</sup> Bu             | 100             | 6       | 78                             | 9                                 |
| 5     | 3:2 Toluene-Acetone | 0.1                | KO <sup>t</sup> Bu             | 60              | 6       | 36                             | 7                                 |
| 6     | 3:2 Toluene-Acetone | -                  | KO <sup>t</sup> Bu             | 100             | 6       | NO <sup>c</sup>                | NO <sup>c</sup>                   |
| 7     | 3:2 Toluene-Acetone | 0.1                | -                              | 100             | 6       | NO <sup>c</sup>                | NO <sup>c</sup>                   |
| 8     | 3:2 Toluene-Acetone | 0.1                | KOH                            | 100             | 6       | NO <sup>c</sup>                | 4                                 |
| 9     | 3:2 Toluene-Acetone | 0.1                | K <sub>3</sub> PO <sub>4</sub> | 100             | 6       | NO <sup>c</sup>                | NO <sup>c</sup>                   |
| 10    | 3:2 Toluene-Acetone | 0.1                | CsCO <sub>3</sub>              | 100             | 6       | NO <sup>c</sup>                | NO <sup>c</sup>                   |
| 11    | Toluene             | 0.1                | KO <sup>t</sup> Bu             | 100             | 6       | 9                              | NO <sup>c</sup>                   |
| 12    | Acetone             | 0.1                | KO <sup>t</sup> Bu             | 100             | 6       | 48                             | 16                                |

<sup>a</sup> Reaction conditions: Benzyl alcohol (1.0 mmol), solvent (5.0 mL), base (0.25 mol%).

<sup>b</sup> Yields are determined by GCMS based on the quantity of substrate remaining after the reaction. Besides the substrate and the reported product(s), no other species was detected in any of the reactions.

<sup>c</sup> Not observed.

**Table S21.** Crystallographic data and structure refinement parameters

|                            | [Ru(dppbz)(CO)(dmsO)<br>Cl <sub>2</sub> ]                                            | [Ru(dppbz) <sub>2</sub> Cl <sub>2</sub> ]                                           | [Ru(dppbz)(q) <sub>2</sub> ]                                                       | [Ru(dppbz)(pic) <sub>2</sub> ]                                                                                   |
|----------------------------|--------------------------------------------------------------------------------------|-------------------------------------------------------------------------------------|------------------------------------------------------------------------------------|------------------------------------------------------------------------------------------------------------------|
| empirical formula          | C <sub>33</sub> H <sub>30</sub> O <sub>2</sub> P <sub>2</sub> SCl <sub>2</sub><br>Ru | C <sub>60</sub> H <sub>48</sub> O <sub>2</sub> P <sub>4</sub> Cl <sub>2</sub><br>Ru | C <sub>48</sub> H <sub>36</sub> N <sub>2</sub> O <sub>2</sub> P <sub>2</sub><br>Ru | C <sub>42</sub> H <sub>32</sub> N <sub>2</sub> O <sub>4</sub> P <sub>2</sub><br>Ru·C <sub>7</sub> H <sub>8</sub> |
| formula weight             | 724.55                                                                               | 1064.83                                                                             | 835.80                                                                             | 883.84                                                                                                           |
| crystal system             | triclinic                                                                            | triclinic                                                                           | monoclinic                                                                         | triclinic                                                                                                        |
| space group                | P $\bar{1}$                                                                          | P $\bar{1}$                                                                         | P2 <sub>1</sub> /n                                                                 | P $\bar{1}$                                                                                                      |
| <i>a</i> (Å)               | 9.718(10)                                                                            | 10.5247(4)                                                                          | 11.5311(5)                                                                         | 10.0627(4)                                                                                                       |
| <i>b</i> (Å)               | 10.552(12)                                                                           | 11.6210(4)                                                                          | 21.0156(8)                                                                         | 10.8128(4)                                                                                                       |
| <i>c</i> (Å)               | 17.40(2)                                                                             | 12.8705(2)                                                                          | 16.2155(6)                                                                         | 20.1657(8)                                                                                                       |
| $\alpha$ (°)               | 88.50(4)                                                                             | 86.888(2)                                                                           | 90                                                                                 | 76.224(2)                                                                                                        |
| $\beta$ (°)                | 82.77(4)                                                                             | 77.258(2)                                                                           | 94.246(2)                                                                          | 79.050(3)                                                                                                        |
| $\gamma$ (°)               | 64.17(3)                                                                             | 80.961(2)                                                                           | 90                                                                                 | 84.212(3)                                                                                                        |
| <i>V</i> (Å <sup>3</sup> ) | 1592(3)                                                                              | 1516.01(9)                                                                          | 3918.8(3)                                                                          | 2088.67(14)                                                                                                      |
| <i>Z</i>                   | 2                                                                                    | 1                                                                                   | 4                                                                                  | 2                                                                                                                |
| <i>F</i> (000)             | 736                                                                                  | 546                                                                                 | 1712                                                                               | 908                                                                                                              |
| crystal size<br>(mm)       | 0.14 × 0.14 ×<br>0.20                                                                | 0.12 × 0.18 ×<br>0.22                                                               | 0.22 × 0.24 ×<br>0.28                                                              | 0.20 × 0.25 ×<br>0.30                                                                                            |
| <i>T</i> (K)               | 293                                                                                  | 273                                                                                 | 296                                                                                | 296                                                                                                              |
| $\mu$ (mm <sup>-1</sup> )  | 0.856                                                                                | 0.485                                                                               | 0.525                                                                              | 0.500                                                                                                            |
| R1 <sup>a</sup>            | 0.1183                                                                               | 0.0478                                                                              | 0.0597                                                                             | 0.0537                                                                                                           |
| wR2 <sup>b</sup>           | 0.2980                                                                               | 0.1437                                                                              | 0.1997                                                                             | 0.1518                                                                                                           |
| GOF <sup>c</sup>           | 0.94                                                                                 | 1.03                                                                                | 1.13                                                                               | 0.94                                                                                                             |

<sup>a</sup>  $R1 = \sum ||F_o| - |F_c|| / \sum |F_o|$ . <sup>b</sup>  $wR2 = [\sum \{w(F_o^2 - F_c^2)^2\} / \sum \{w(F_o^2)\}]^{1/2}$ . <sup>c</sup>  $GOF = [\sum (w(F_o^2 - F_c^2)^2) / (M - N)]^{1/2}$ , where M is the number of reflections and N is the number of parameters refined.
